# Supplementary material
Source: publisher figshare collection journal article supplement (https://karger.figshare.com/ndownloader/files/14356889)
Supplement: Supplementary file 1 [file 14356889]

**
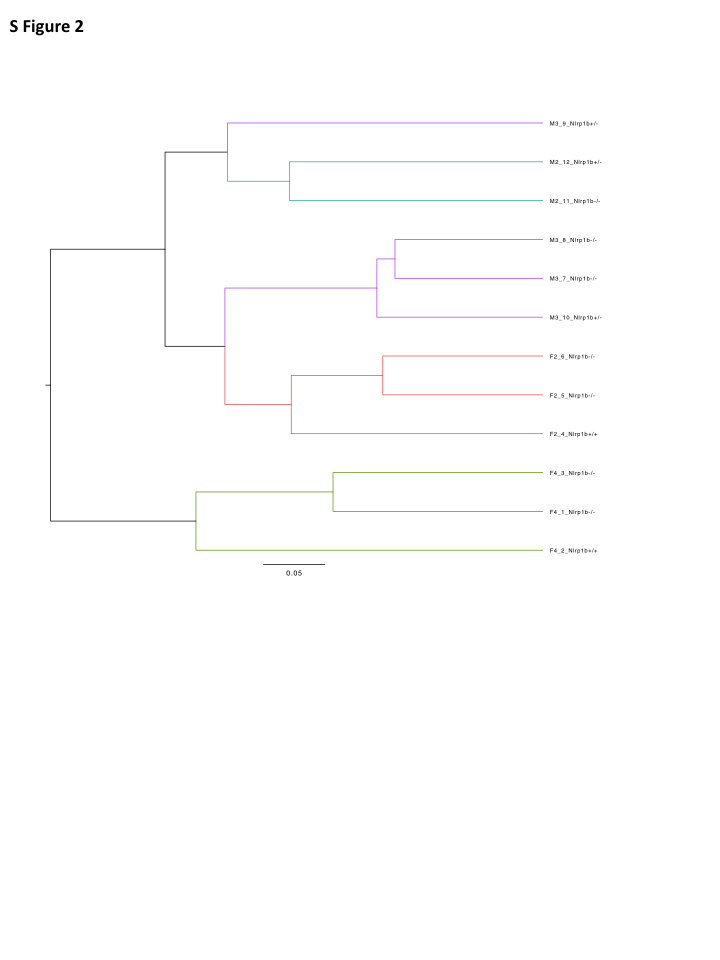
**

**Fig. S2. Matched-co-housed animals separate based on cage.** Clustering analysis based on Bray-Curtis distance shows that rather than genotype being the predictor for clustering, it is cage-dependent.
